# Supplementary material
Source: publisher figshare collection journal article supplement (https://sage.figshare.com/ndownloader/files/12710378)
Supplement: Supplementary file 1 [file 12710378]

**Supplementary material**

| **Intra-rater agreement for video self-assessment** | | | | | | |
| --- | --- | --- | --- | --- | --- | --- |
| **Score difference** | **Mode A** | **%** | **Mode B** | **%** | **Mode C** | **%** |
| None | 158 | 79 | 148 | 74 | 144 | 72 |
| 1 | 38 | 19 | 45 | 22.5 | 55 | 27.5 |
| 2 | 4 | 2 | 7 | 3.5 | 1 | 0.5 |

**Supplementary Table 2** Intra-rater agreement for video self-assessment with the three examination modes. Calculations are based on 200 cat eyes, resulting from 50 evaluated cats per examiner.
